# Supplementary material for: Identifying Novel Drug Targets by iDTPnd: A Case Study of Kinase Inhibitors
Source: PubMed Central journal article supplement (PMC9403029; doi:10.1016/j.gpb.2020.05.006), 2021-03-29

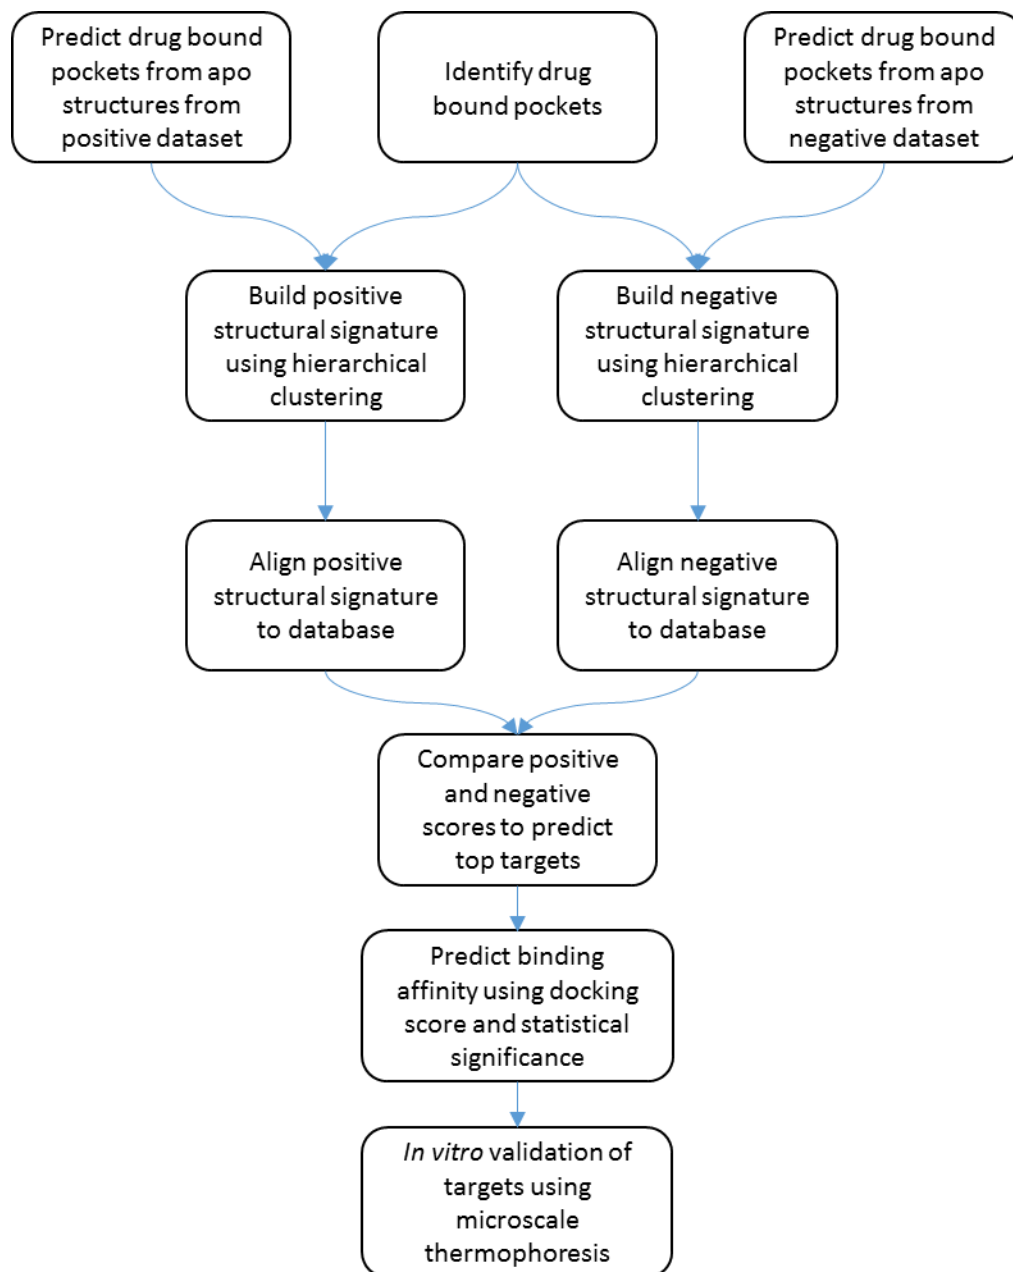

Supplement: mmc1.pdf [file mmc1.pdf]
